# Supplementary material for: Individual and Combined Association Between Prenatal Polysubstance Exposure and Childhood Risk of Attention-Deficit/Hyperactivity Disorder
Source: PubMed Central journal article supplement (PMC8917426; doi:10.1001/jamanetworkopen.2022.1957), 2022-03-11

## Supplementary Online Content

Garrison-Desany HM, Hong X, Maher BS, et al. Individual and combined association between prenatal polysubstance exposure and childhood risk of attention-deficit/hyperactivity disorder. *JAMA Netw Open.* 2022;5(3):e221957. doi:10.1001/jamanetworkopen.2022.1957

**eTable 1.** Comparison of Sociodemographic Characteristics Among Cohort Participants Who Completed Baseline Questionnaire vs Those With Electronic Medical Record Follow-up

**eTable 2.** Pearson Correlation Matrix of Substance Exposures

**eTable 3.** Unadjusted and Adjusted Cox Proportional Hazards Estimates of Polysubstance Scores With Additional Weighting Schema

**eTable 4.** Stratification of Single-Substance Cox Proportional Hazards Models and Substance-Adjusted Models by Sex of Child

**eTable 5.** Cross-Validated Penalized Regression Models for Training Data Set of All Individual Substances and Their Interactions, Adjusted for Major Covariates

**eTable 6.** Unadjusted and Adjusted Cox Proportional Hazards Models Using Individual Substance and Polysubstance Categories With Multiple Imputation Limited to Neurotypical Children as Comparator

**eTable 7.** Unadjusted and Adjusted Cox Proportional Hazards Models Using Individual Substance and Polysubstance Categories With Inverse Probability Weighting for Preterm Birth to Correct for Potential Selection Bias in the Baseline Sample Selection

**eTable 8.** E Values of Main Substance Effects in Cox Proportional Hazards Model Reflecting Unmeasured Confounding and Exposure Misclassification Bias

**eFigure 1.** Directed Acyclic Graph of Substance Exposures, Attention-Deficit/Hyperactivity Disorder Outcomes, and Measured Covariates

**eFigure 2.** Unweighted vs Weighted Polysubstance Score by Attention-Deficit/Hyperactivity Disorder Diagnosis

**eFigure 3.** Estimated Change in H Function Due to Univariate Substance Exposure Differences

**eFigure 4.** Estimated Change in H Function by the Estimated Bivariate Response Conditional on Concurrent Substance Exposure

**eFigure 5.** Schoenfeld Residuals of Multiple Imputation Data (Data Set 1)

**eFigure 6.** Schoenfeld Residuals of Multiple Imputation Data (Data Set 2)

**eFigure 7.** Schoenfeld Residuals of Multiple Imputation Data (Data Set 3)

**eFigure 8.** Schoenfeld Residuals of Multiple Imputation Data (Data Set 4)

**eFigure 9.** Schoenfeld Residuals of Multiple Imputation Data (Data Set 5)

**eFigure 10.** Schoenfeld Residuals of Multiple Imputation Data (Data Set 6)

**eFigure 11.** Schoenfeld Residuals of Multiple Imputation Data (Data Set 7)

**eFigure 12.** Schoenfeld Residuals of Multiple Imputation Data (Data Set 8)

**eFigure 13.** Schoenfeld Residuals of Multiple Imputation Data (Data Set 9)

**eFigure 14.** Schoenfeld Residuals of Multiple Imputation Data (Data Set 10)

This supplementary material has been provided by the authors to give readers additional information about their work

**eTable 1.** Comparison of Sociodemographic Characteristics Among Cohort Participants Who Completed Baseline Questionnaire vs Those With Electronic Medical Record Follow-up

| Characteristic                | Baseline Sample<br>(N=8509) | Sample with Follow-up<br>(N=3138) |
|-------------------------------|-----------------------------|-----------------------------------|
| Maternal age, median (IQR), y | 27.8 (23.0, 32.9)           | 28.2 (23.2, 33.4)                 |
| Missing                       | 0                           | 0                                 |
| Maternal race/ethnicity       |                             |                                   |
| Asian (non-Pacific Islander)  | 180 (2.1%)                  | 46 (1.4%)                         |
| Hispanic                      | 2423 (28.5%)                | 701 (22.3%)                       |
| Non-Hispanic Black            | 4031 (47.4%)                | 1838 (58.6%)                      |
| Non-Hispanic White            | 1006 (11.8%)                | 227 (7.3%)                        |
| Other <sup>a</sup>            | 869 (10.2%)                 | 326 (10.4%)                       |
| Missing                       | 0                           | 0                                 |
| Maternal marital status       |                             |                                   |
| Single                        | 5220 (61.3%)                | 1993 (63.5%)                      |
| Married                       | 2871 (33.7%)                | 1024 (32.6%)                      |
| Other <sup>b</sup>            | 249 (2.9%)                  | 89 (2.8%)                         |
| Missing                       | 169 (2.0%)                  | 32 (1.0%)                         |
| Maternal education            |                             |                                   |
| No school or elementary       | 526 (6.2%)                  | 132 (4.2%)                        |
| Some secondary                | 2104 (24.7%)                | 737 (23.5%)                       |
| High school graduate          | 2793 (32.8%)                | 1137 (36.2%)                      |
| Some college                  | 1640 (19.3%)                | 684 (21.8%)                       |
| College graduate              | 1286 (15.1%)                | 426 (13.6%)                       |
| Missing                       | 160 (1.9%)                  | 22 (0.7%)                         |
| Yearly income                 |                             |                                   |
| <\$35,000 per year            | 3763 (44.2%)                | 1457 (46.4%)                      |
| ≥\$35,000 per year            | 3853 (45.3%)                | 1357 (43.2%)                      |
| Don't Know                    | 893 (10.5%)                 | 324 (10.3%)                       |
| Maternal obesity status       |                             |                                   |
| Normal weight                 | 3797 (44.6%)                | 1318 (42.0%)                      |
| Underweight                   | 370 (4.3%)                  | 134 (4.3%)                        |
| Overweight                    | 2156 (25.3%)                | 813 (25.9%)                       |
| Obese                         | 1607 (18.9%)                | 703 (22.4%)                       |
| Missing                       | 579 (6.8%)                  | 170 (5.4%)                        |
| BMI, median (IQR)             | 24.7 (21.6, 28.9)           | 25.2 (22.0, 29.8)                 |
| Previous births               |                             |                                   |
| None                          | 3663 (43.0%)                | 1340 (42.7%)                      |
| ≥1                            | 4846 (57.0%)                | 1798 (57.3%)                      |
| Missing                       | 0                           | 0                                 |
| Substance Exposure            |                             |                                   |
| Smoking                       | 1635 (19.2%)                | 577 (18.4%)                       |

|                                |              |              |
|--------------------------------|--------------|--------------|
| Missing                        | 73 (0.8%)    | 19 (0.6%)    |
| Alcohol                        | 736 (8.6%)   | 249 (7.9%)   |
| Missing                        | 312 (3.7%)   | 97 (3.1%)    |
| Cannabis                       | 333 (3.9%)   | 123 (3.9%)   |
| Missing                        | 5 (0.04%)    | 0 (0.0%)     |
| Opioids                        | 190 (2.2%)   | 60 (1.9%)    |
| Missing                        | 7 (0.1%)     | 0 (0.0%)     |
| Child sex                      |              |              |
| Female                         | 4272 (50.2%) | 1555 (49.6%) |
| Male                           | 4327 (49.8%) | 1583 (50.4%) |
| Child postnatal care visits    |              |              |
| less than 2 visits             | 781 (9.2%)   | 187 (6.0%)   |
| 3 to 4 visits                  | 2169 (25.5%) | 752 (24.0%)  |
| 5 or more visits               | 2999 (35.2%) | 1070 (34.1%) |
| Missing                        | 2560 (30.1%) | 1129 (36.0%) |
| Child gestational age at birth |              |              |
| Term                           | 6190 (72.7%) | 2237 (71.2%) |
| Preterm                        | 2308 (27.1%) | 897 (28.6%)  |
| Missing                        | 11 (0.1%)    | 4 (0.1%)     |

**eTable 2.** Pearson Correlation Matrix of Substance Exposures

|          | Opioids | Cannabis | Alcohol |
|----------|---------|----------|---------|
| Smoking  | 0.25    | 0.29     | 0.17    |
| Alcohol  | 0.01    | 0.15     |         |
| Cannabis | 0.04    |          |         |

**eTable 3.** Unadjusted and Adjusted Cox Proportional Hazards Estimates of Polysubstance Scores With Additional Weighting Schema

|                                             | Unadjusted<br>HR (95% CI) | P-value | Adjusted <sup>1</sup><br>HR (95% CI) | P-value |
|---------------------------------------------|---------------------------|---------|--------------------------------------|---------|
| Unweighted polysubstance score <sup>4</sup> | 1.44 (1.27, 1.63)         | <0.001  | 1.34 (1.17, 1.53)                    | <0.001  |
| Weighted (adj. estimate) <sup>4</sup>       | 1.32 (1.21, 1.44)         | <0.001  | 1.25 (1.13, 1.38)                    | <0.001  |
| Weighted (bootstrap estimate) <sup>5</sup>  | 1.55 (1.35, 1.79)         | <0.001  | 1.43 (1.22, 1.67)                    | <0.001  |

Weighting was conducted using the effect estimates for the adjusted hazards for substances, controlling for concurrent substance use.

<sup>5</sup>Weighting was conducted using Cox proportional hazards estimated bootstrapped over 100,000 iterations for each of the 10 MICE datasets.

**eTable 4.** Stratification of Single-Substance Cox Proportional Hazards Models and Substance-Adjusted Models by Sex of Child

|                                          | Single-substance Cox model <sup>1</sup><br>HR (95% CI) | P-value | Substance-adjusted Cox model <sup>1</sup><br>HR (95% CI) | P-value |
|------------------------------------------|--------------------------------------------------------|---------|----------------------------------------------------------|---------|
| <b>Female Children Only</b>              |                                                        |         |                                                          |         |
| Smoking                                  | 2.35 (1.12, 4.90)                                      | 0.02    | 1.78 (0.74, 4.29)                                        | 0.20    |
| Alcohol                                  | 0.86 (0.28, 2.66)                                      | 0.79    | 0.92 (0.29, 2.86)                                        | 0.88    |
| Cannabis                                 | 3.33 (1.27, 8.78)                                      | 0.01    | 2.15 (0.67, 6.90)                                        | 0.20    |
| Opioids                                  | 2.02 (0.45, 9.08)                                      | 0.36    | 1.28 (0.26, 0.63)                                        | 0.76    |
| Polysubstance score (unweighted)         | 1.55 (1.23, 1.95)                                      | <0.001  |                                                          |         |
| Polysubstance score (adj. weighted)      | 1.40 (1.18, 1.66)                                      | <0.001  |                                                          |         |
| Polysubstance score (bootstrap weighted) | 1.71 (1.31, 2.24)                                      | <0.001  |                                                          |         |
|                                          | Single-substance Cox model <sup>1</sup><br>HR (95% CI) | P-value | Substance-adjusted Cox model <sup>1</sup><br>HR (95% CI) | P-value |
| <b>Male Children Only</b>                |                                                        |         |                                                          |         |
| Smoking                                  | 1.15 (0.68, 1.94)                                      | 0.61    | 1.20 (0.68, 2.12)                                        | 0.54    |
| Alcohol                                  | 1.05 (0.52, 2.13)                                      | 0.89    | 1.03 (0.50, 2.12)                                        | 0.93    |
| Cannabis                                 | 0.66 (0.16, 2.76)                                      | 0.57    | 0.58 (0.13, 2.55)                                        | 0.48    |
| Opioids                                  | 1.21 (0.38, 3.86)                                      | 0.74    | 1.11 (0.33, 3.71)                                        | 0.86    |
| Polysubstance score (unweighted)         | 1.24 (1.05, 1.47)                                      | 0.01    |                                                          |         |
| Polysubstance score (adj. weighted)      | 1.19 (1.05, 1.34)                                      | 0.007   |                                                          |         |
| Polysubstance score (bootstrap weighted) | 1.31 (1.08, 1.59)                                      | 0.006   |                                                          |         |

<sup>1</sup>Adjusted for race/ethnicity, education level, marital status, pre-pregnancy maternal BMI, income quartile,

**eTable 5.** Cross-Validated Penalized Regression Models for Training Data Set of All Individual Substances and Their Interactions, Adjusted for Major Covariates

| Penalization Type:                     | LASSO       | Elastic Net |               |               |                |               |                         |                          |
|----------------------------------------|-------------|-------------|---------------|---------------|----------------|---------------|-------------------------|--------------------------|
|                                        | Forcing all | Unforced    | Force Smoking | Force Alcohol | Force Cannabis | Force Opioids | Force Alcohol & Opioids | Forcing all main effects |
| Smoking                                | 1.59        | 1.32        | 1.47          | 1.32          | 1.31           | 1.30          | 1.29                    | 1.59                     |
| Alcohol                                | 1.31        | 1.13        | 1.13          | 1.33          | 1.15           | 1.13          | 1.34                    | 1.31                     |
| Cannabis                               | 1.08        |             |               |               | 1.08           |               |                         | 1.08                     |
| Opioids                                | 1.60        | 1.02        | 1.02          |               |                | 2.03          | 2.04                    | 1.60                     |
| Interactions                           |             |             |               |               |                |               |                         |                          |
| Opioids x Cannabis                     |             | 1.51        | 1.57          | 1.67          | 1.61           | 1.25          | 1.29                    |                          |
| Smoking x Cannabis                     |             | 1.01        |               | 1.06          |                | 1.01          |                         |                          |
| Smoking x Opioids x Cannabis           |             | 1.16        | 1.20          | 1.25          | 1.16           | 1.04          | 1.04                    |                          |
| Alcohol x Cannabis                     |             |             |               | 0.89          |                |               |                         |                          |
| Smoking x Alcohol x Cannabis           |             |             |               |               |                |               |                         |                          |
| Alcohol x Opioids                      |             | 1.77        | 1.88          | 1.78          | 1.91           | 1.002         |                         |                          |
| Smoking X Alcohol                      |             | 1.02        |               |               | 1.02           | 1.04          |                         |                          |
| Smoking x Opioids                      |             | 1.62        | 1.51          | 1.77          | 1.70           |               |                         |                          |
| Smoking x Alcohol x Opioids            |             |             |               |               |                | 1.11          |                         |                          |
| Alcohol x Opioids x Cannabis           |             |             |               |               |                |               |                         |                          |
| Smoking x Alcohol x Opioids x Cannabis |             |             |               |               |                |               |                         |                          |

<sup>1</sup>“Forcing” indicates that these variables were not penalized in the model and remained in the regression regardless of the shrinkage parameter.

<sup>2</sup>Sociodemographic covariates (race/ethnicity, education level, marital status, pre-pregnancy BMI, income, parity, child sex, maternal age) were also included in the model for adjustment with no forcing. Most often, education, race/ethnicity, marital status, and child’s sex were retained in the model after variable selection.



**eTable 6.** Unadjusted and Adjusted Cox Proportional Hazards Models Using Individual Substance and Polysubstance Categories With Multiple Imputation Limited to Neurotypical Children as Comparator

|                                                              | Unadjusted HR (95% CI) | P-value | Adjusted <sup>1</sup> HR (95% CI) | P-value |
|--------------------------------------------------------------|------------------------|---------|-----------------------------------|---------|
| Adjusting for no other substances in the models <sup>2</sup> |                        |         |                                   |         |
| Smoking                                                      | 1.81 (1.47, 2.22)      | <0.001  | 1.58 (1.26, 1.97)                 | <0.001  |
| Alcohol                                                      | 1.45 (1.07, 1.96)      | 0.02    | 1.33 (0.98, 1.80)                 | 0.07    |
| Cannabis                                                     | 1.48 (0.97, 2.26)      | 0.07    | 1.31 (0.85, 2.01)                 | 0.22    |
| Opioids                                                      | 2.70 (1.46, 5.00)      | 0.001   | 2.19 (1.10, 4.37)                 | 0.03    |
| Adjusting for all other substances in the model <sup>3</sup> |                        |         |                                   |         |
| Smoking                                                      | 1.70 (1.35, 2.12)      | <0.001  | 1.51 (1.20, 1.92)                 | <0.001  |
| Alcohol                                                      | 1.28 (0.94, 1.74)      | 0.12    | 1.23 (0.90, 1.68)                 | 0.19    |
| Cannabis                                                     | 1.00 (0.64, 1.57)      | 0.99    | 1.01 (0.64, 1.58)                 | 0.97    |
| Opioids                                                      | 1.98 (1.05, 3.71)      | <0.001  | 1.95 (0.97, 3.93)                 | 0.06    |
| Polysubstance category                                       |                        |         |                                   |         |
| No substances                                                | Ref                    |         | Ref                               |         |
| 1 substance                                                  | 1.50 (1.20, 1.88)      | <0.001  | 1.33 (1.05, 1.68)                 | 0.02    |
| 2+ substances                                                | 2.23 (1.64, 3.03)      | <0.001  | 1.90 (1.38, 2.62)                 | <0.001  |
| Pairwise Substance Combinations                              |                        |         |                                   |         |
| Smoking + Alcohol                                            | 2.20 (1.44, 3.36)      | <0.001  | 1.84 (1.20, 2.84)                 | 0.006   |
| Smoking + Cannabis                                           | 1.97 (1.27, 3.07)      | 0.003   | 1.76 (1.12, 2.78)                 | 0.01    |
| Smoking + Opioids                                            | 3.34 (1.68, 6.64)      | <0.001  | 2.83 (1.22, 6.55)                 | 0.02    |
| Opioids + Alcohol                                            | 4.21 (0.98, 18.03)     | 0.05    | 3.01 (0.69, 13.19)                | 0.14    |
| Opioids + Cannabis                                           | 4.86 (0.68, 34.64)     | 0.11    | 8.16 (1.12, 59.24)                | 0.04    |
| Additive polysubstance score <sup>4</sup>                    | 1.44 (1.27, 1.63)      | <0.001  | 1.34 (1.17, 1.53)                 | <0.001  |

<sup>1</sup>Adjusted for race/ethnicity, education level, marital status, pre-pregnancy maternal BMI, income quartile, nulliparity, maternal age, and sex of the child.

<sup>2</sup>These four models were independent of one another with no adjustment for other substance use in each.

<sup>3</sup>This represents a single model where all substances are included as covariates in order to adjust for exposure to one another.

<sup>4</sup>Ranges from 0 to 4, with each substance equally contributing a value of 1 point if used during pregnancy. This represents the number of substances used during pregnancy.

**eTable 7.** Unadjusted and Adjusted Cox Proportional Hazards Models Using Individual Substance and Polysubstance Categories With Inverse Probability Weighting for Preterm Birth to Correct for Potential Selection Bias in the Baseline Sample Selection

|                                     | Cox model<br>HR (95% CI) | P-value | Substance-adjusted Cox<br>Model<br>HR (95% CI) | P-value |
|-------------------------------------|--------------------------|---------|------------------------------------------------|---------|
| Unadjusted                          |                          |         |                                                |         |
| Smoking                             | 1.51 (1.22, 1.85)        | <0.001  | 1.46 (1.16, 1.83)                              | 0.001   |
| Alcohol                             | 1.42 (1.05, 1.91)        | 0.02    | 1.27 (0.94, 1.73)                              | 0.12    |
| Cannabis                            | 1.32 (0.86, 2.03)        | 0.20    | 0.99 (0.63, 1.56)                              | 0.98    |
| Opioids                             | 1.28 (0.70, 2.34)        | 0.42    | 0.99 (0.53, 1.84)                              | 0.98    |
| Polysubstance score<br>(unweighted) | 1.28 (1.13, 1.44)        | <0.001  |                                                |         |
| Adjusted                            |                          |         |                                                |         |
| Smoking                             | 1.34 (1.07, 1.68)        | 0.010   | 1.30 (1.02, 1.64)                              | 0.03    |
| Alcohol                             | 1.31 (0.97, 1.77)        | 0.08    | 1.22 (0.90, 1.66)                              | 0.20    |
| Cannabis                            | 1.26 (0.82, 1.94)        | 0.30    | 1.05 (0.67, 1.65)                              | 0.83    |
| Opioids                             | 1.15 (0.60, 2.20)        | 0.68    | 1.02 (0.53, 1.97)                              | 0.95    |
| Polysubstance score<br>(unweighted) | 1.21 (1.06, 1.38)        | 0.005   |                                                |         |

**eTable 8.** E Values of Main Substance Effects in Cox Proportional Hazards Model Reflecting Unmeasured Confounding and Exposure Misclassification Bias

|                             | E-value |
|-----------------------------|---------|
| Smoking only                | 1.39    |
| Alcohol only                | 1.20    |
| Cannabis only               | 1.01    |
| Opioids only                | 1.65    |
| Single substance            | 1.27    |
| Polysubstance (any)         | 1.62    |
| Additive score (unweighted) | 1.28    |
| Smoking and alcohol         | 1.59    |
| Smoking and cannabis        | 1.54    |
| Smoking and opioids         | 2.08    |
| Opioids and alcohol         | 2.15    |
| Opioids and cannabis        | 3.76    |

**eFigure 1.** Directed Acyclic Graph of Substance Exposures, Attention-Deficit/Hyperactivity Disorder Outcomes, and Measured Covariates

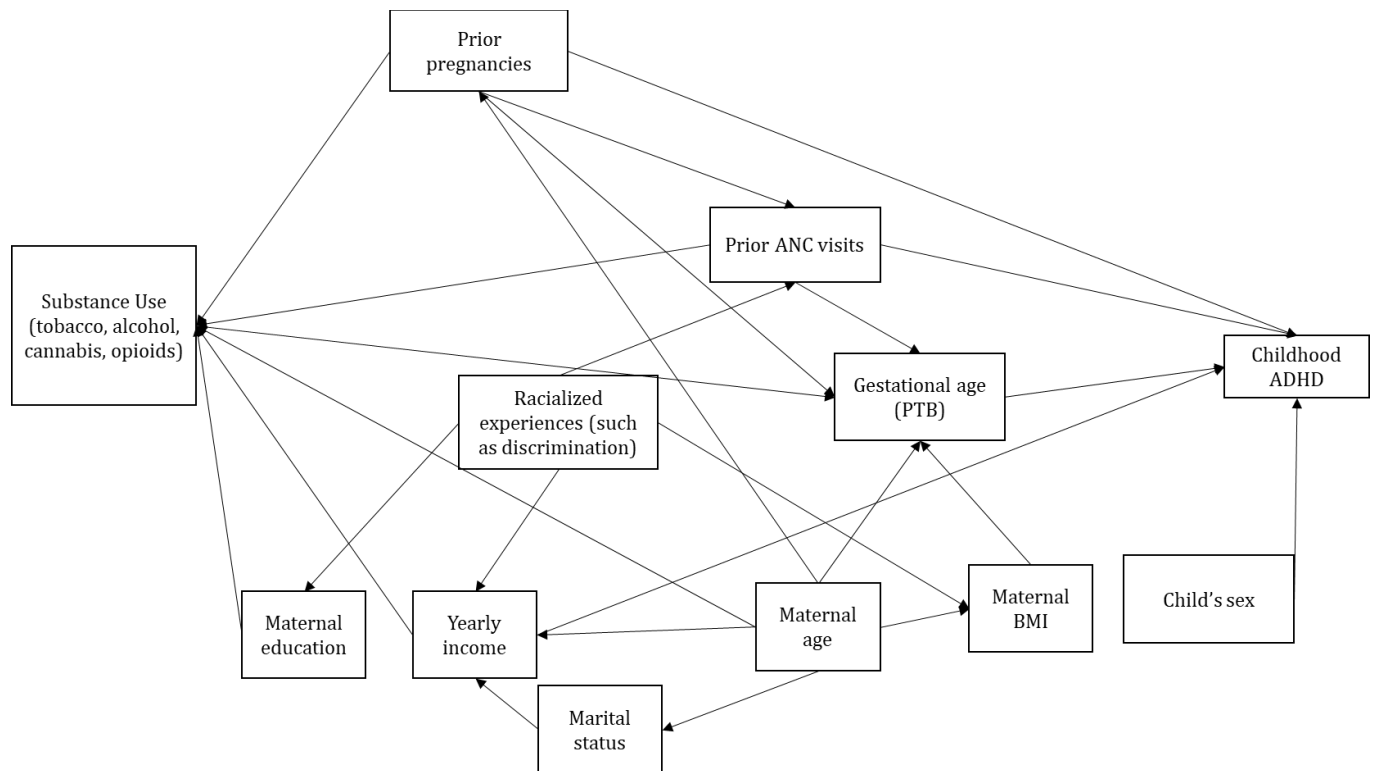

**eFigure 2.** Unweighted vs Weighted Polysubstance Score by Attention-Deficit/Hyperactivity Disorder Diagnosis

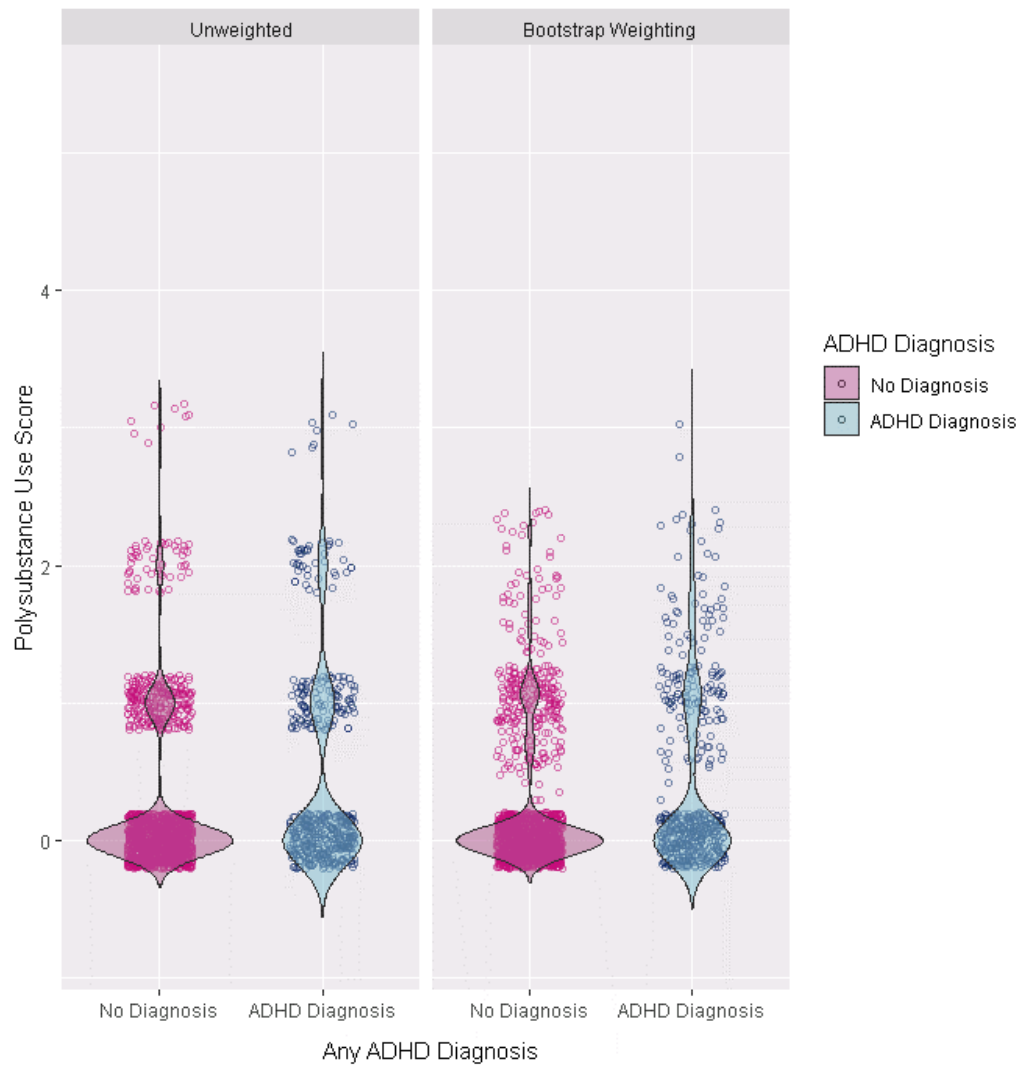

Panels: Unweighted: Unweighted polysubstance score was the sum of substances used during pregnancy. Bootstrap Weighting: Weighting was conducted using Cox proportional hazards estimated bootstrapped over 10,000 iterations for each of the 10 MICE datasets.

**eFigure 3.** Estimated Change in H Function Due to Univariate Substance Exposure Differences

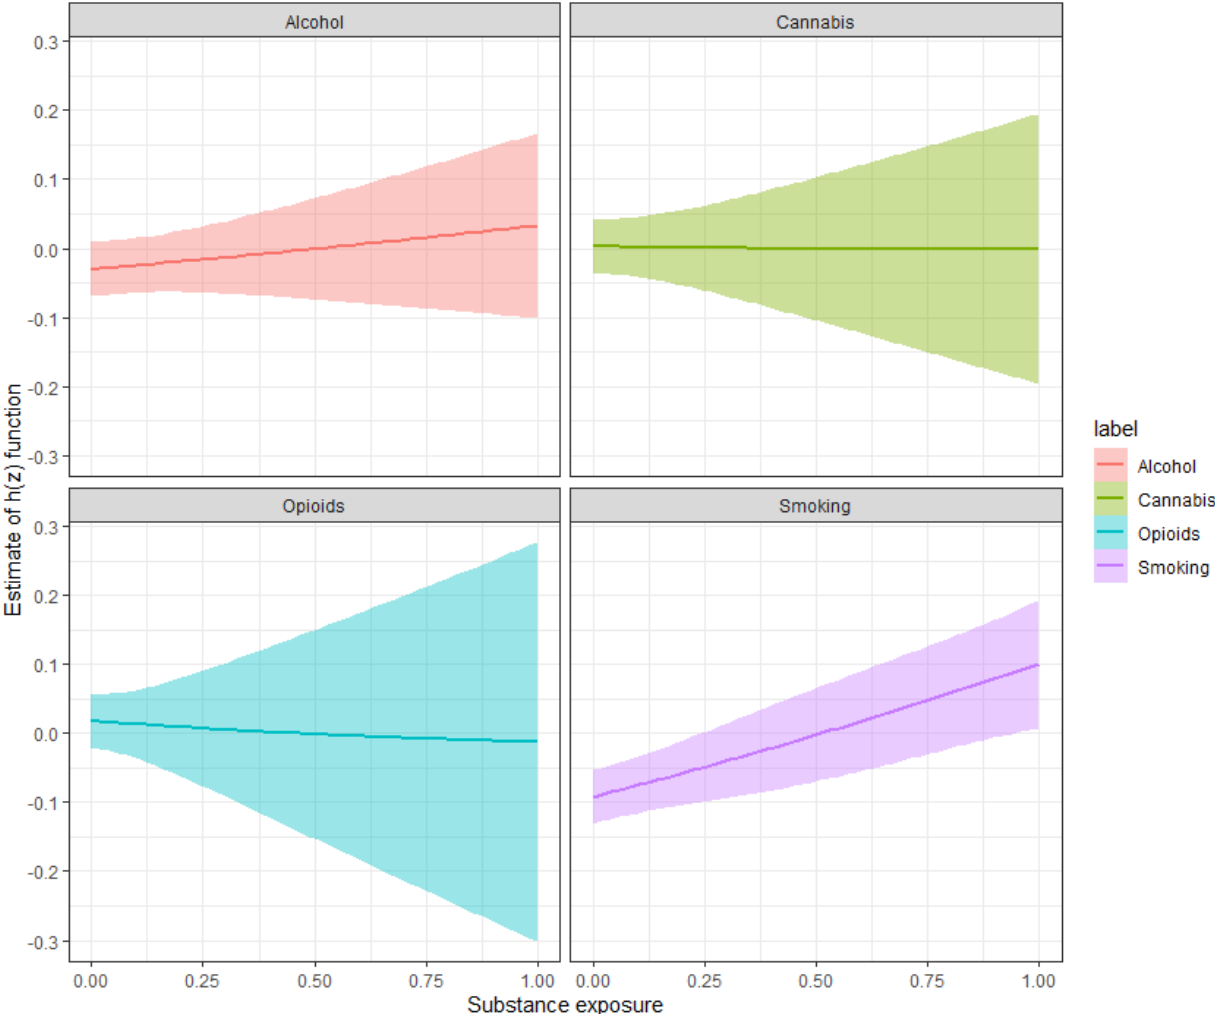

**eFigure 4.** Estimated Change in H Function by the Estimated Bivariate Response Conditional on Concurrent Substance Exposure

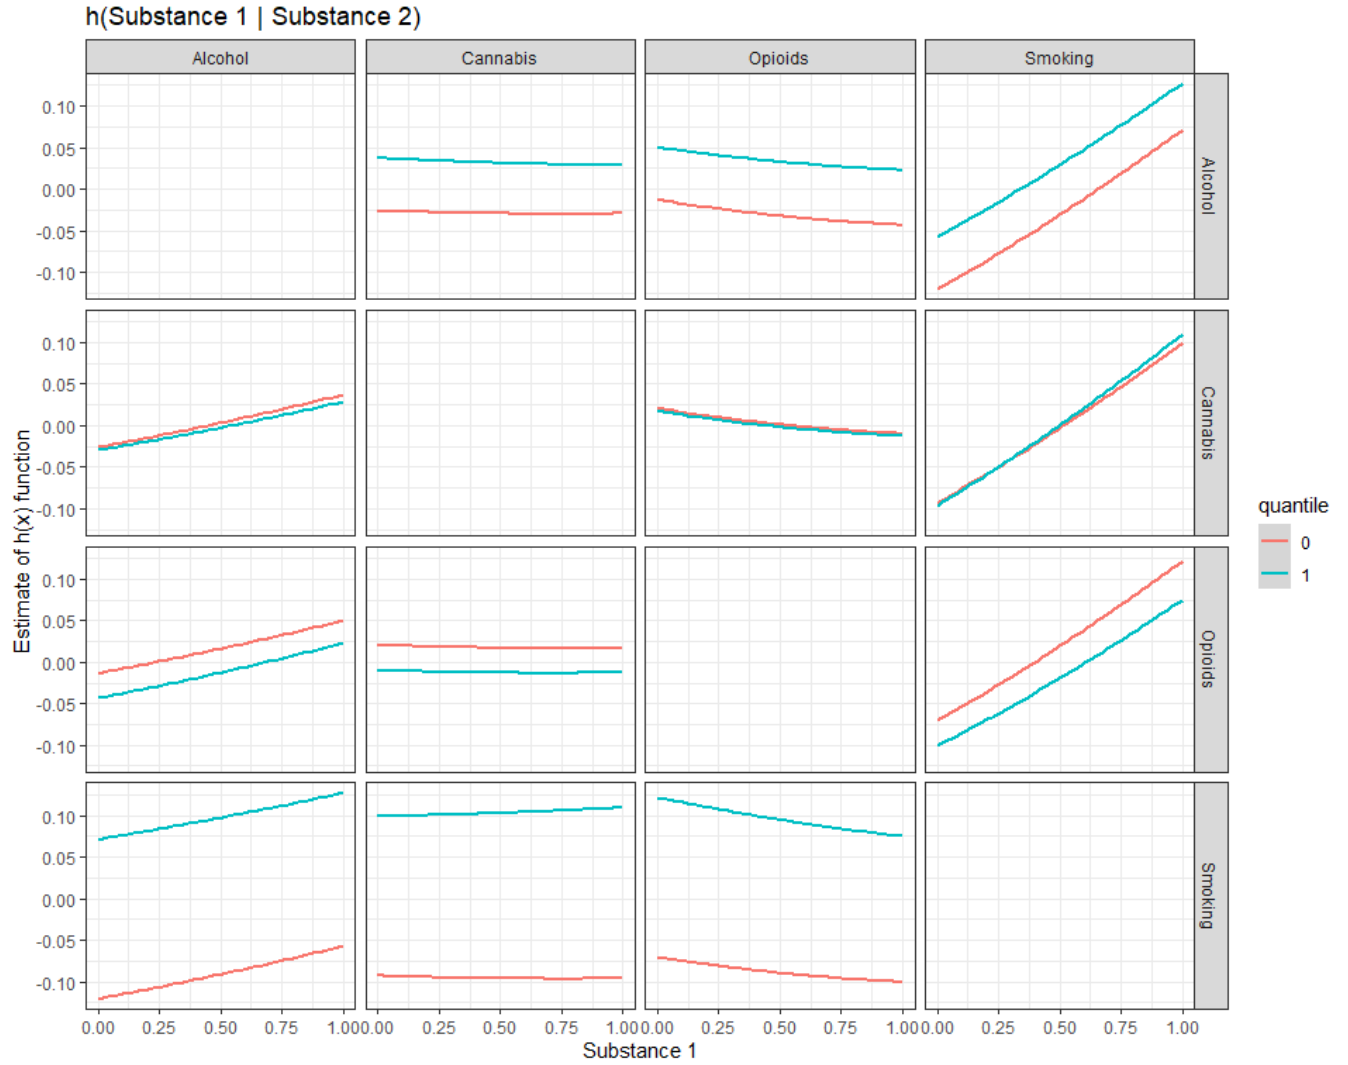

**eFigure 5.** Schoenfeld Residuals of Multiple Imputation Data (Data Set 1)

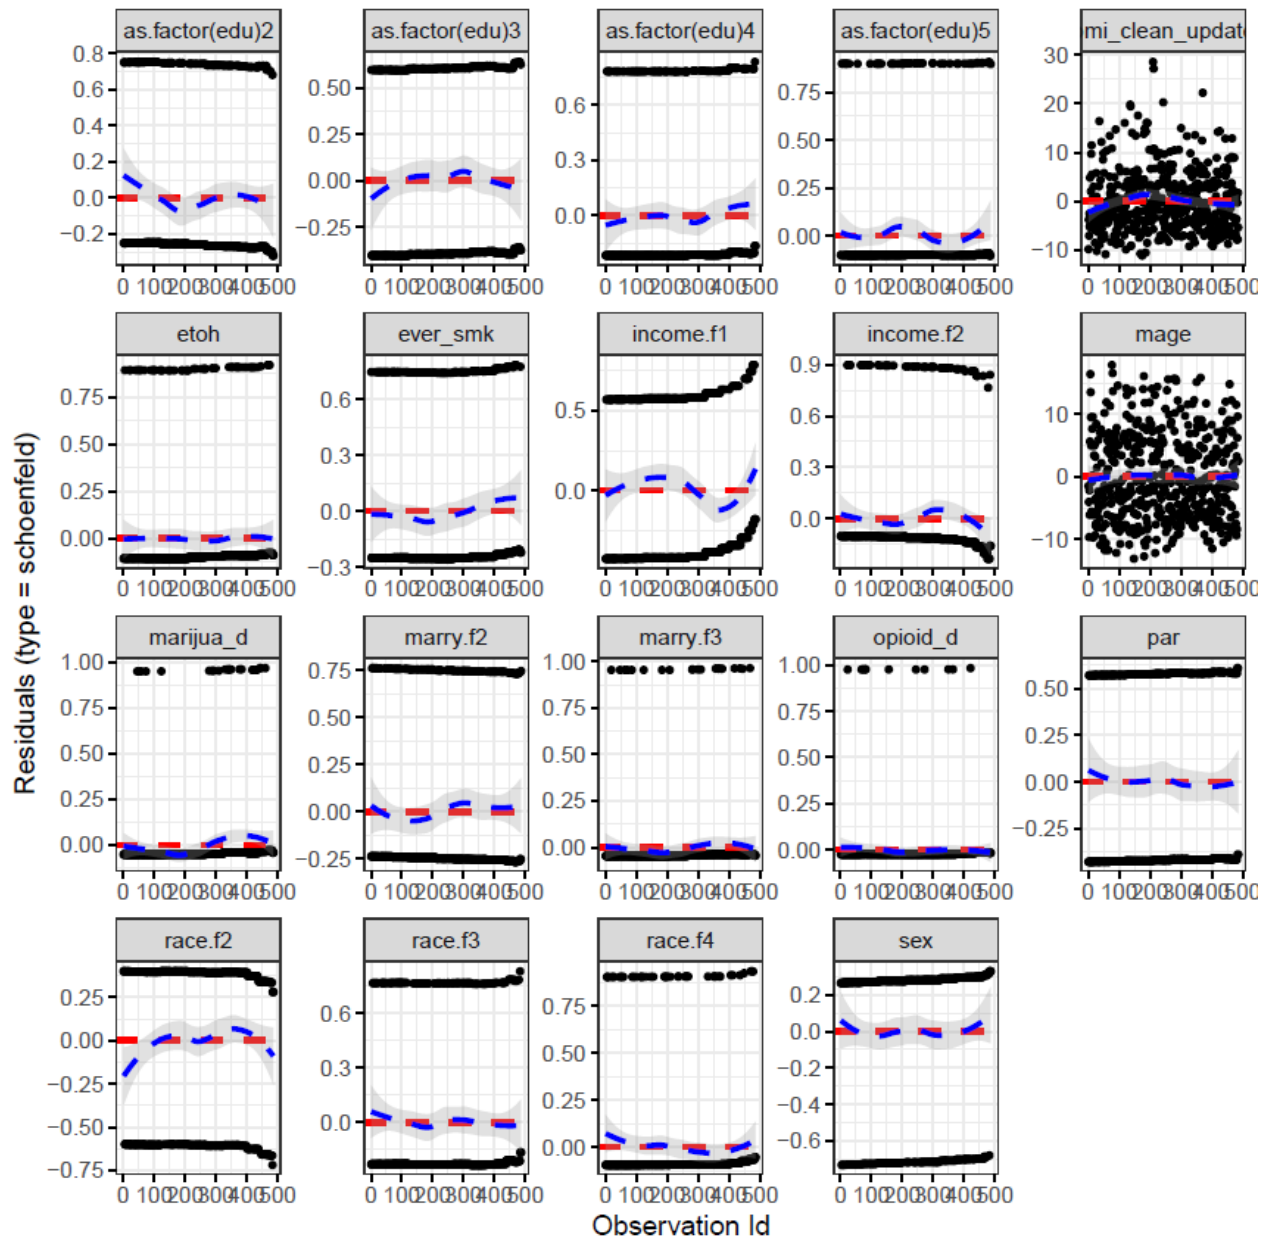



**eFigure 6.** Schoenfeld Residuals of Multiple Imputation Data (Data Set 2)

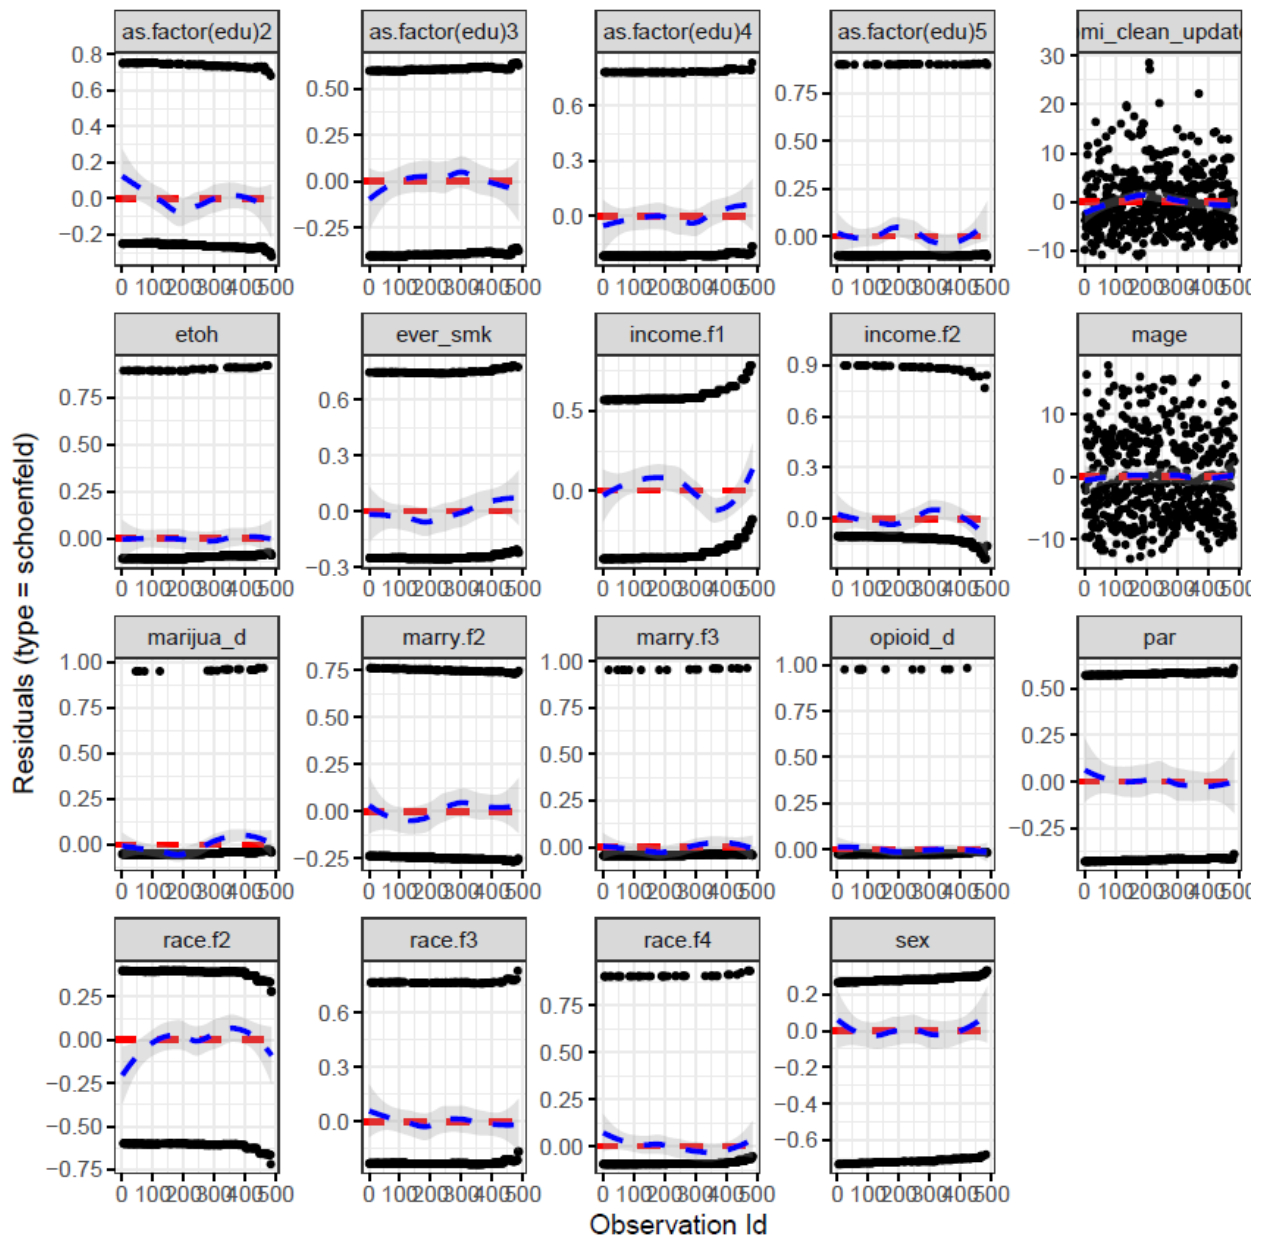

**eFigure 7.** Schoenfeld Residuals of Multiple Imputation Data (Data Set 3)

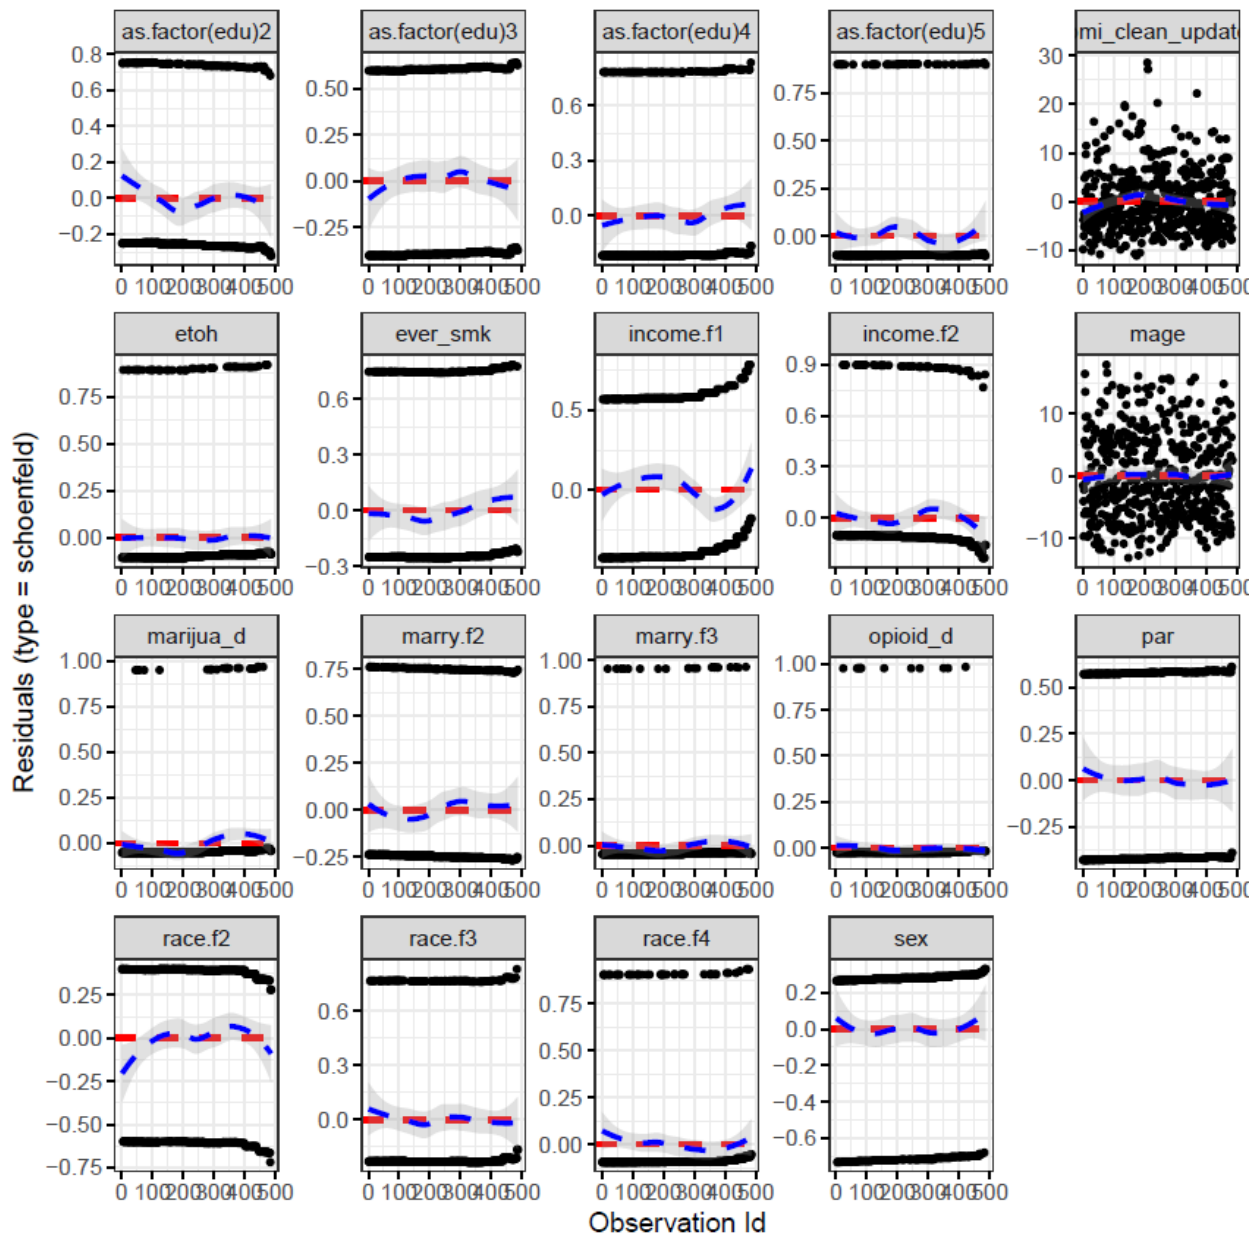

**eFigure 8.** Schoenfeld Residuals of Multiple Imputation Data (Data Set 4)

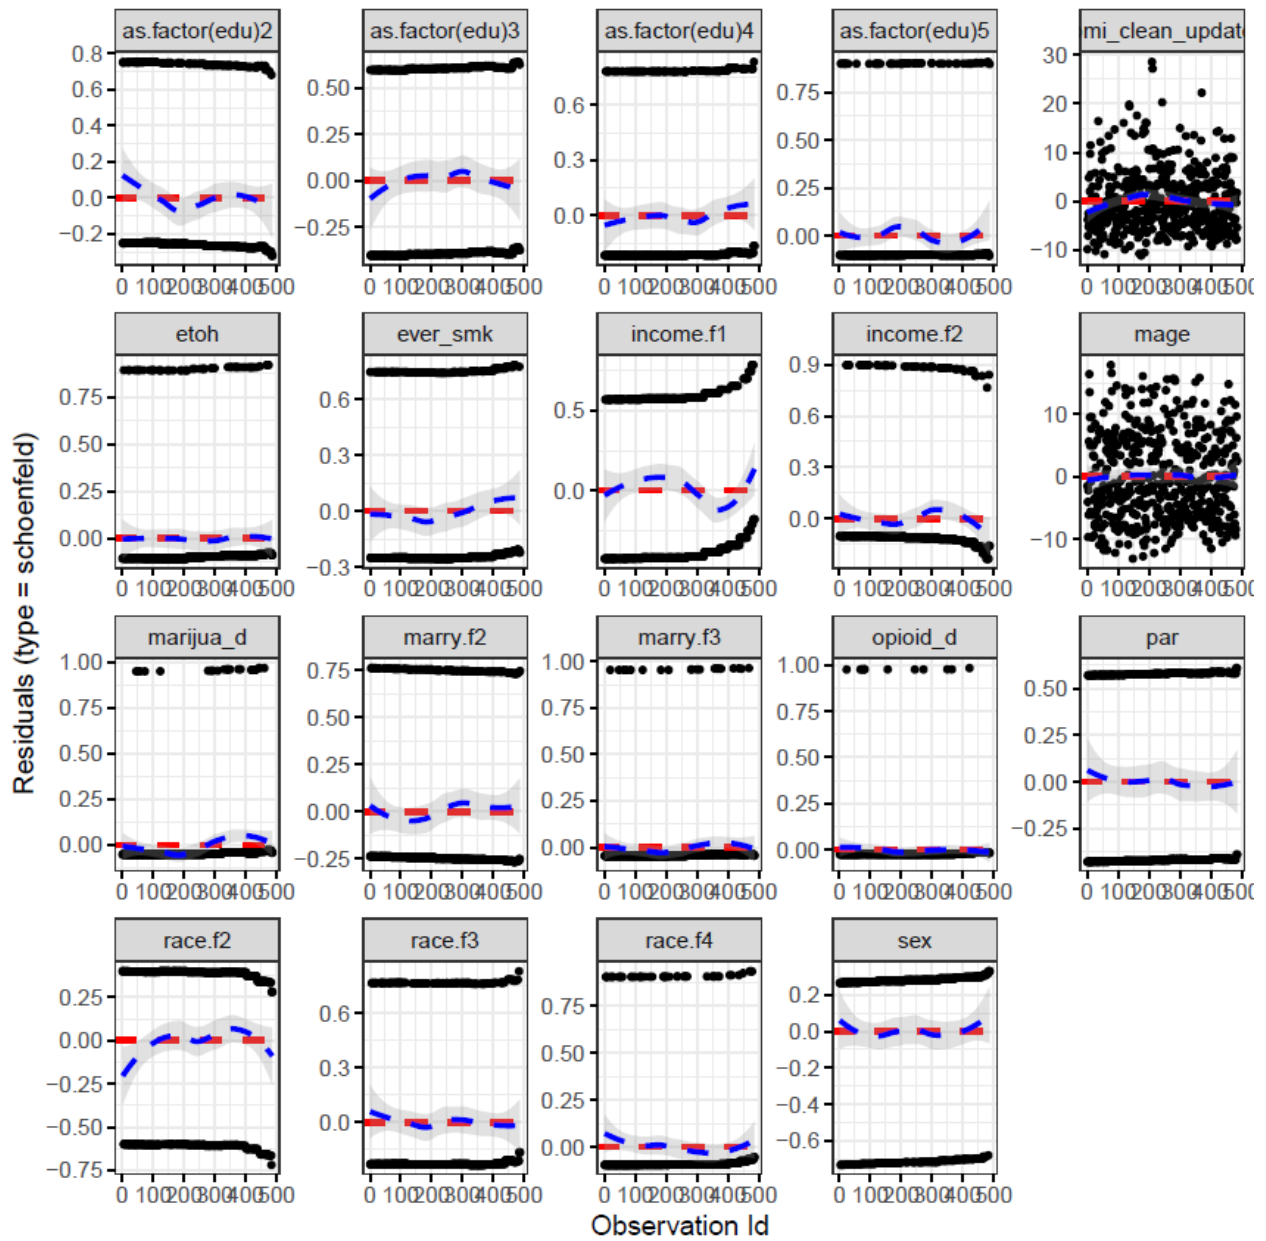

**eFigure 9.** Schoenfeld Residuals of Multiple Imputation Data (Data Set 5)

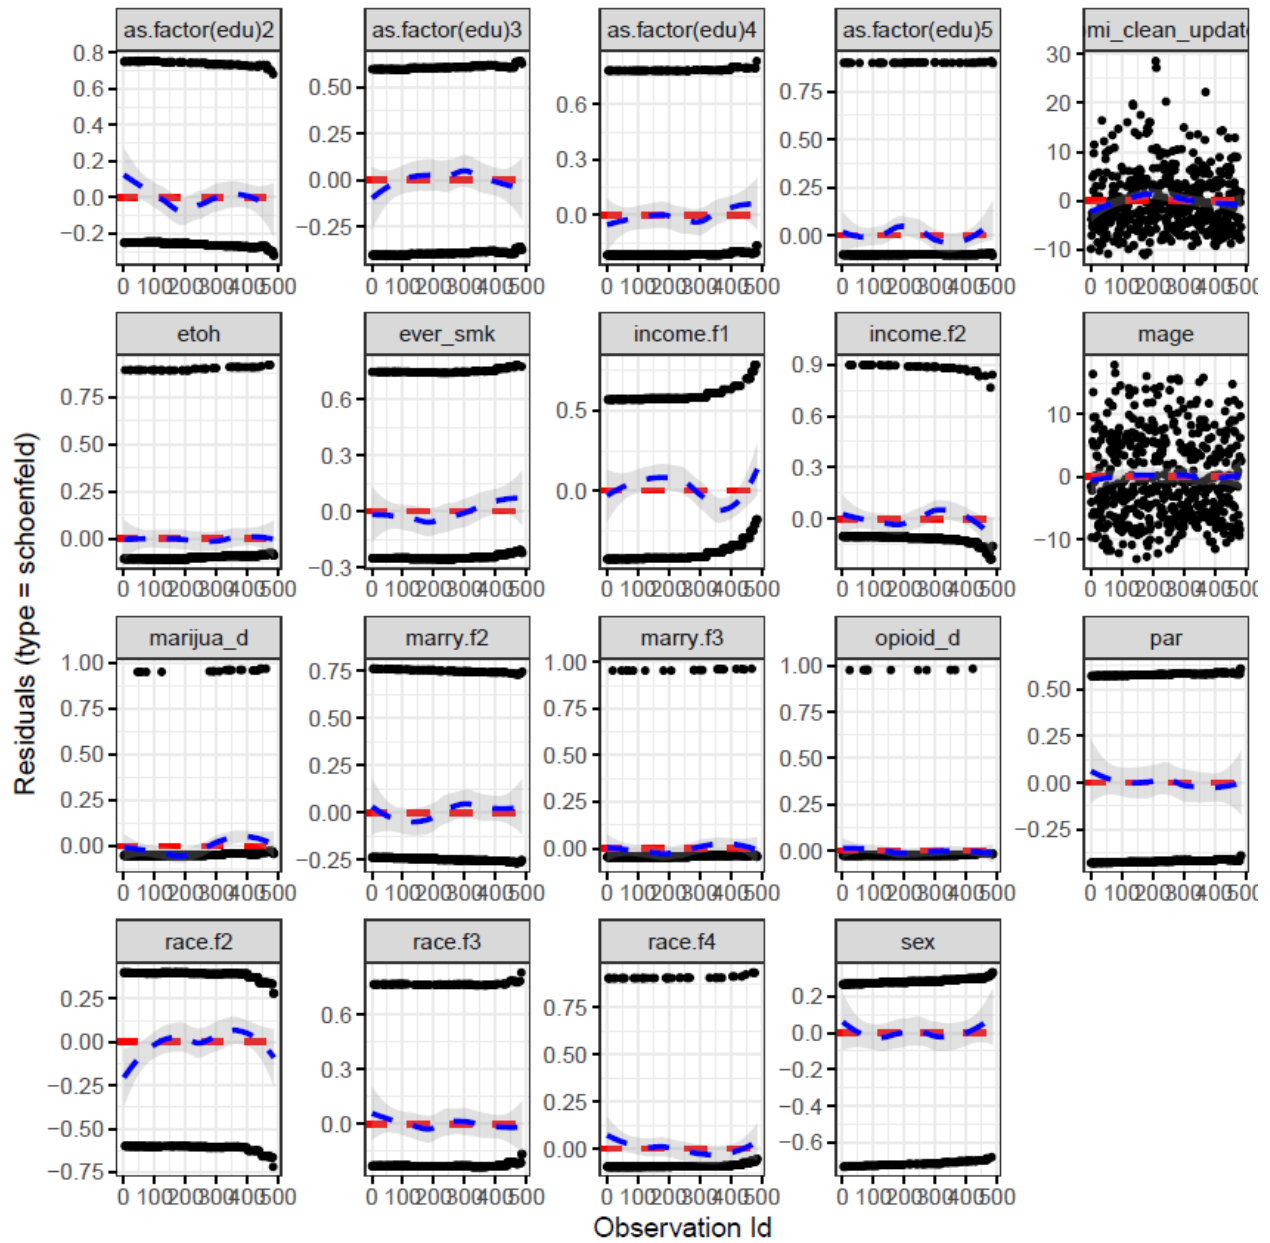

**eFigure 10.** Schoenfeld Residuals of Multiple Imputation Data (Data Set 6)

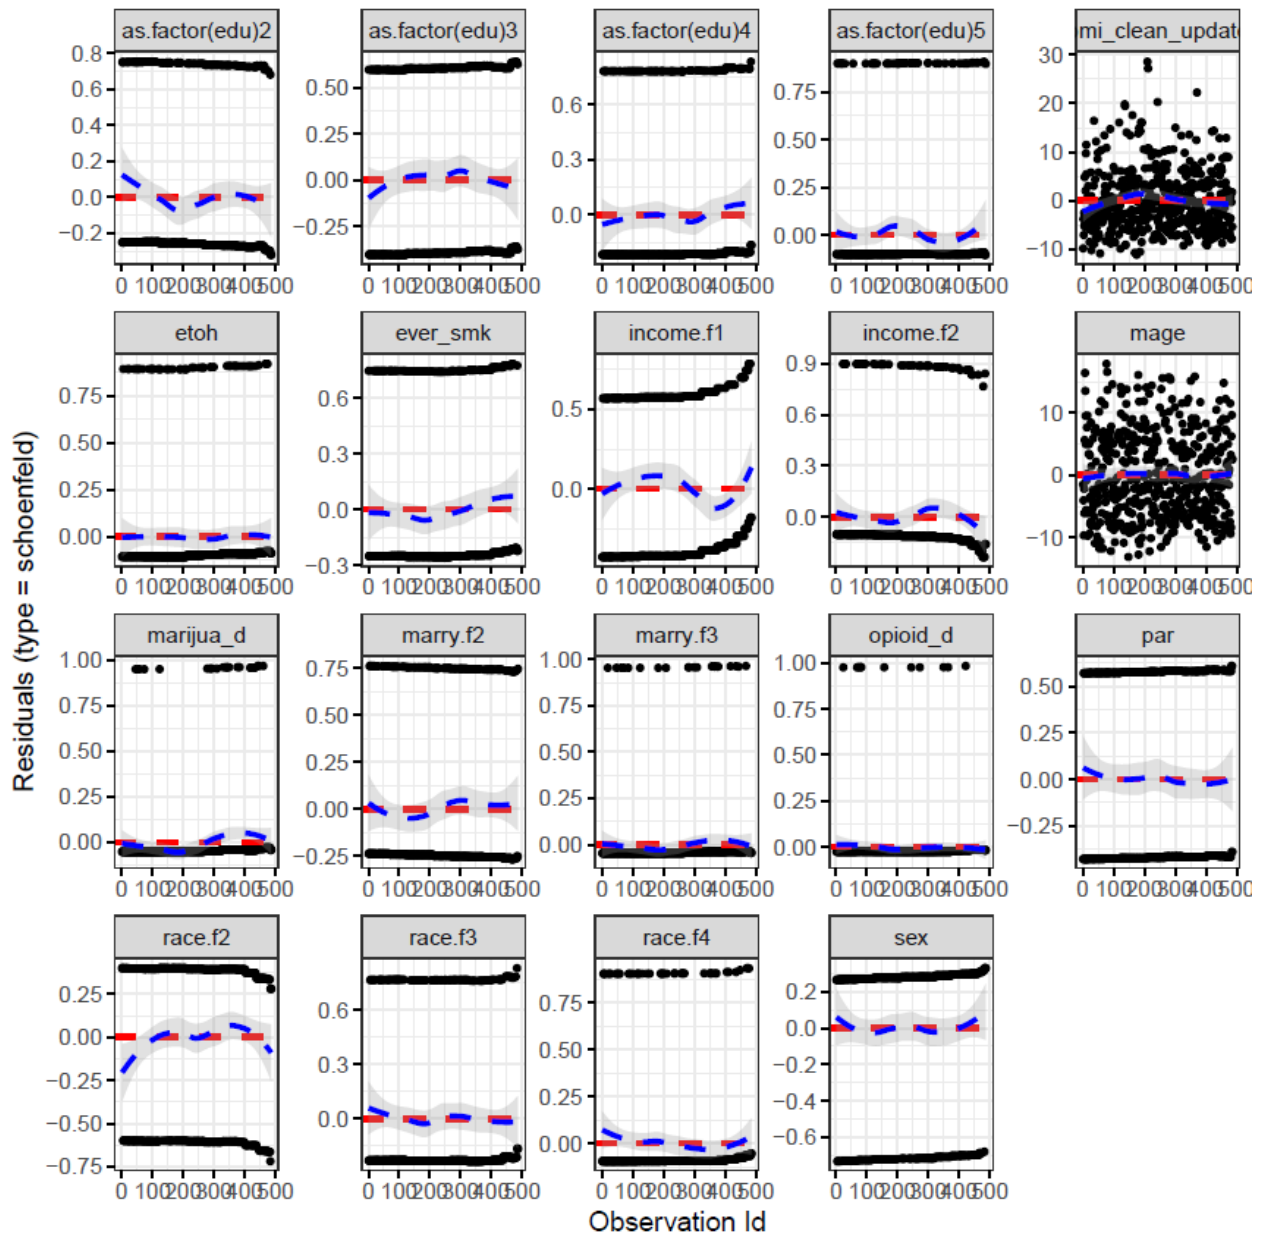

**eFigure 11.** Schoenfeld Residuals of Multiple Imputation Data (Data Set 7)

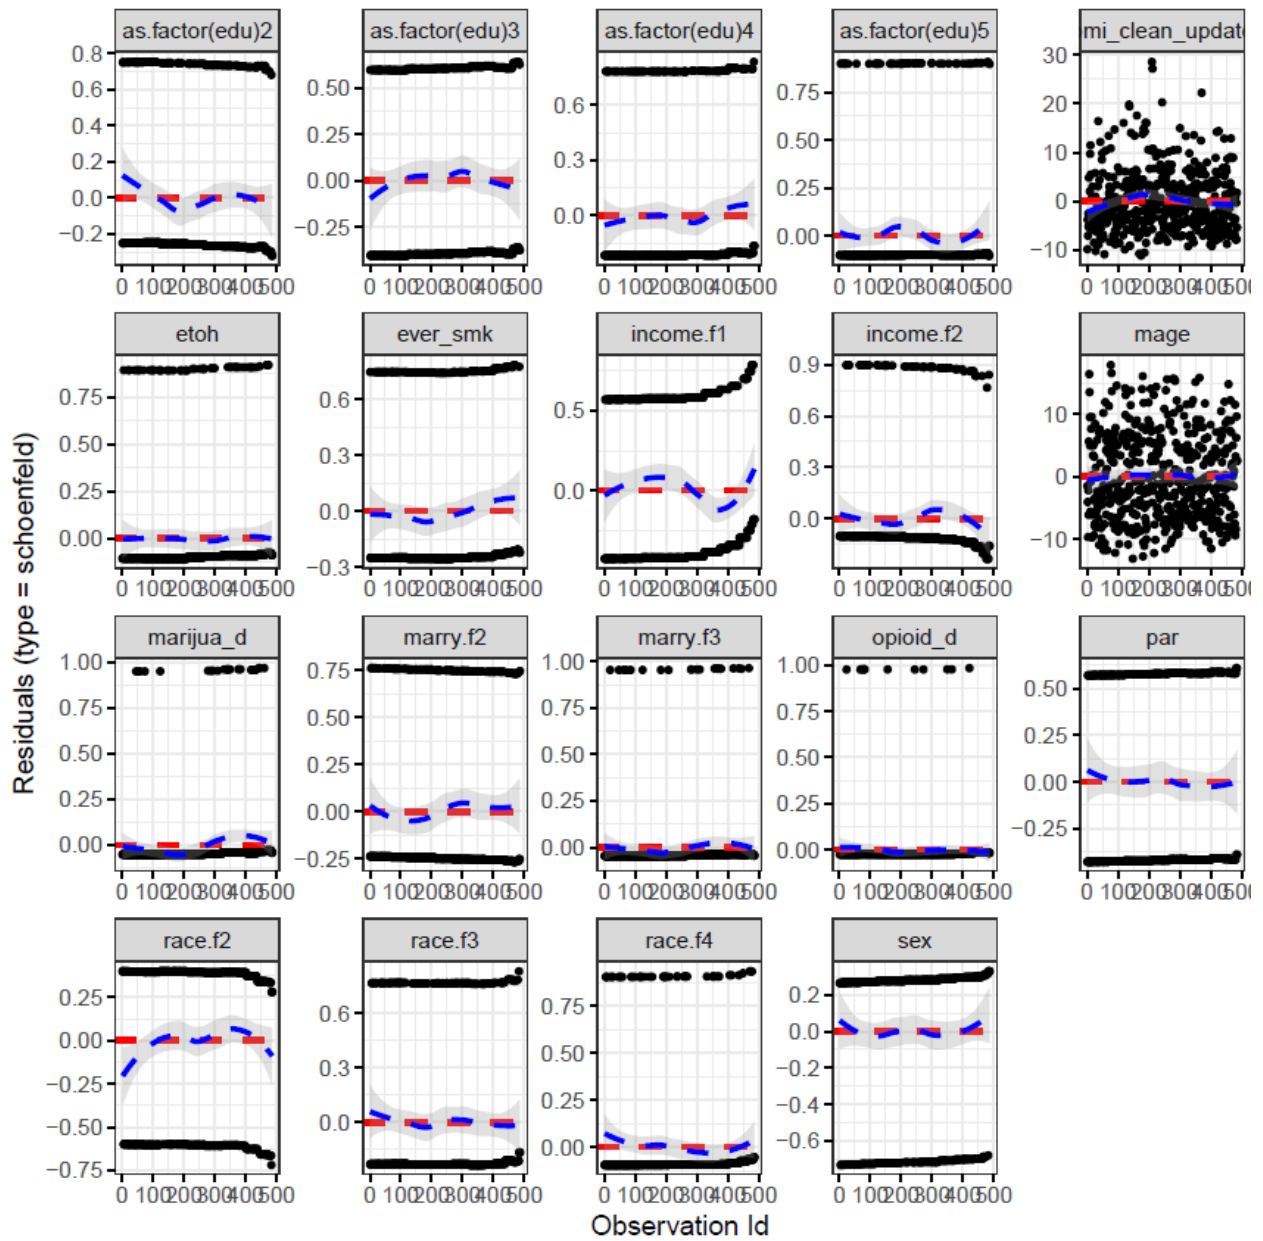

**eFigure 12.** Schoenfeld Residuals of Multiple Imputation Data (Data Set 8)

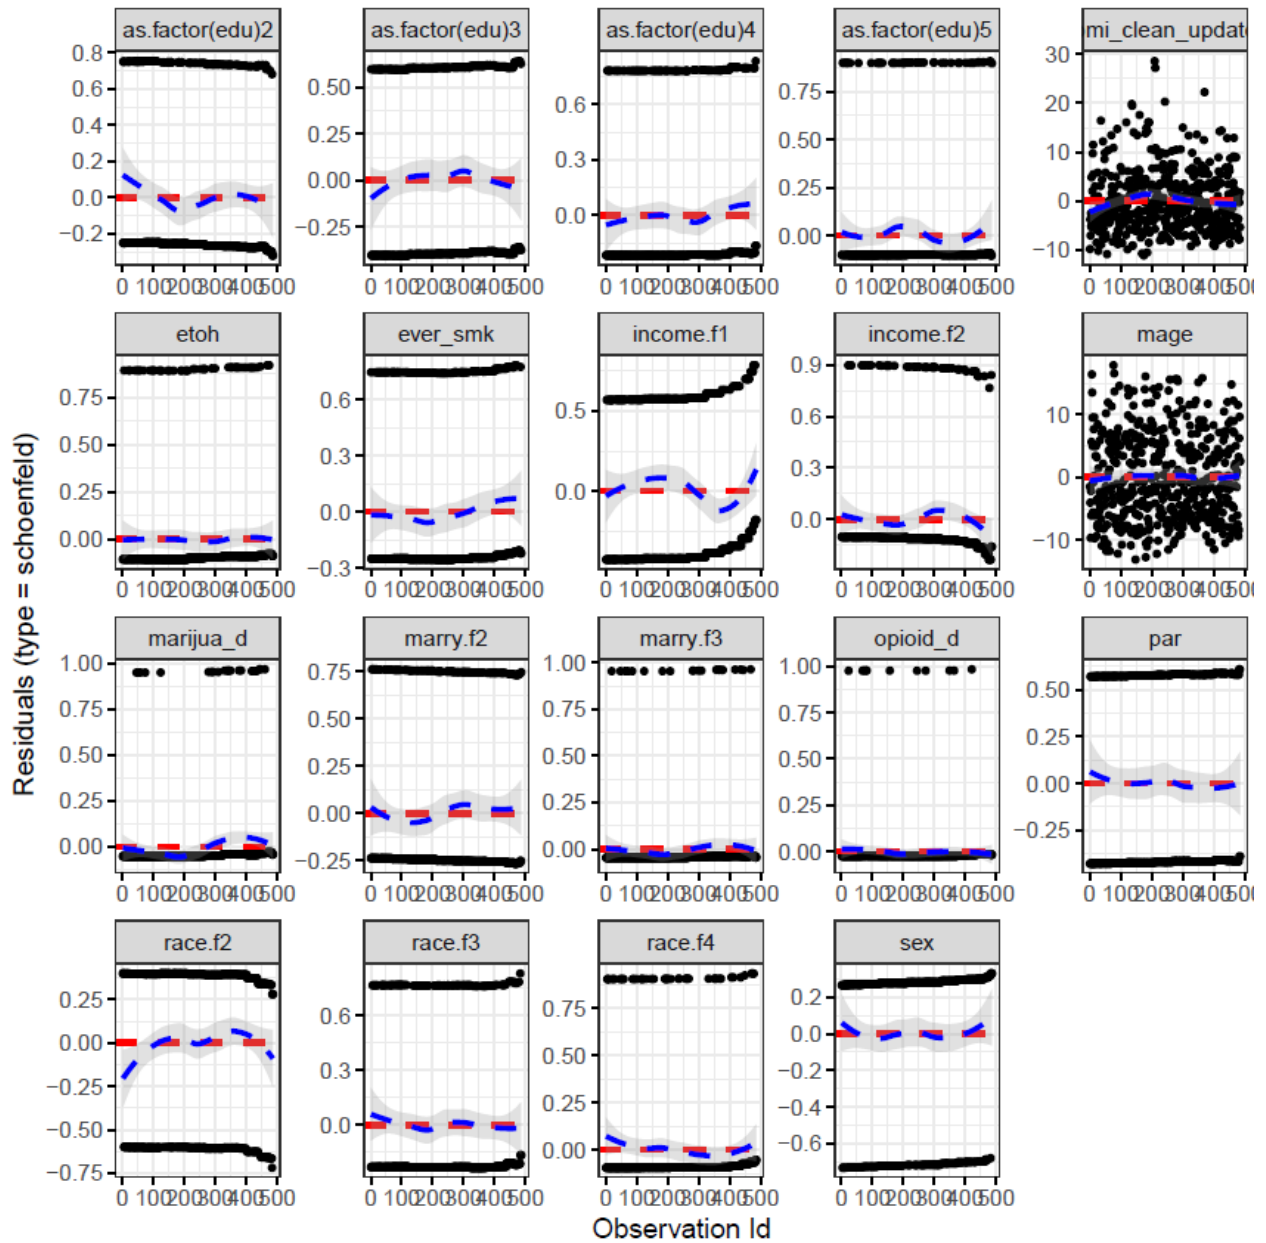

**eFigure 13.** Schoenfeld Residuals of Multiple Imputation Data (Data Set 9)

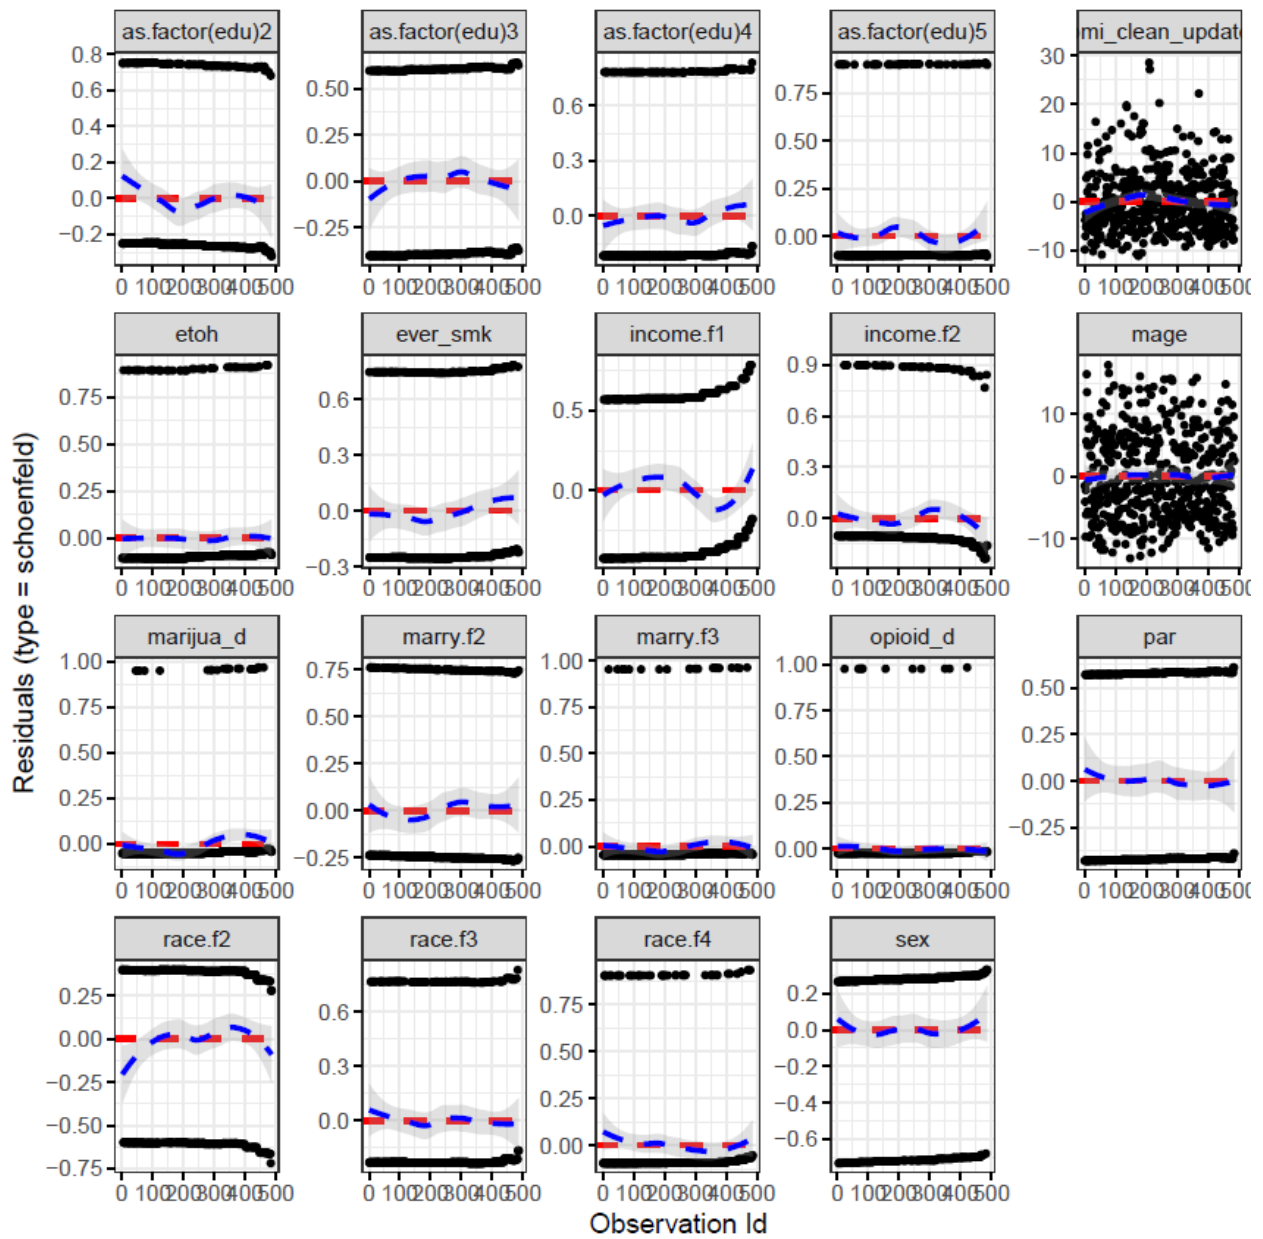



**eFigure 14.** Schoenfeld Residuals of Multiple Imputation Data (Data Set 10)



Supplement: jamanetwopen-e221957-s001.pdf [file jamanetwopen-e221957-s001.pdf]
